# Supplementary material for: FLEXIQuant-LF to quantify protein modification extent in label-free proteomics data
Source: eLife. 2020 Dec 7;9:e58783. doi: 10.7554/eLife.58783 (PMC7721442; doi:10.7554/eLife.58783)
Supplement: Supplementary file 3. [file elife-58783-supp3.xlsx]

## Sheet: Modification Simulation Errors
				Before in silico modification			After in silico modification
Protein	Peptide count	Peptide	in silico factor	RM (rep 1)	RM (rep 2)	RM (rep 3)	RM (rep 1, rep 1 modified)	RM (rep 2, rep 2 modified)	RM (rep 3, rep 3 modified)
Q9UKL0	8	SLADLPNFTPFPDEWTVEDK	0.31	0.937395	1.00956	0.831768			0.257848
Q9UKL0	8	WTTEEQLLAVQAIR	0.64	0.937395	0.977595	0.986255	0.608294	0.628371	0.631203
Q9UKL0	8	LDEYIAIAK	0.7	0.904115	1	1	0.632881	0.718892	0.725767
O43159	6	YLNEQLYSGPSSAAQR	0.37	1.02236	0.787002	0.93421		0.291191
O43159	6	ASFASASAEVGKK	0.07	1	1.1344	0.691369			0.0483958
O43159	6	KASFASASAEVGKK	0.67	1	0.850268	1.0296		0.569679
O43159	6	LFQEDPEAFLLYHR	0.35	0.977795	1	0.985947	0.342228	0.357948	0.352918
O95714	6	VRPQASLTATHSSTLAEEVVALLR	0.57	0.914801	1.11329	0.937114	0.521436	0.723033
O95714	6	LGIGGTESVSTPTLLESIQHVFIK	0.46	1	0.760519	1		0.349839
O95714	6	SILDSWVWGK	0.94	0.943726	0.9594	1.0464	0.887103		1
O75146	6	KPPLAQKPSVAPR	0.95	1	1	0.987033	1	0.965603	0.936319
O75146	6	LPEGPPNFLR	0.24	1	0.983841	1	0.312133	0.236465	0.239651
P12259	8	AEVDDVIQVR	0.55	0.96482	0.904068	1	0.530651	0.515368	0.570055
P12259	8	NLASRPYSLHAHGLSYEK	0.4	0.94261	0.945003	1	0.377044		0.424354
P12259	8	YLDSTFTK	0.44	1.03066	0.876349	0.998183	0.470881	0.386296	0.439201
P11169	6	LWGTQDVSQDIQEMK	0.49	1	0.996853	1	0.509902	0.488199	0.613188
P11169	6	AFEGQAHGADR	0.58	1	1.00053	0.801625	0.711615	0.686362	0.464942
Q9H444	5	EALENANTNTEVLK	0.04	0.989702	1	1.01726	0.0382819	0.0404162	0.0422032
Q9H444	5	KIEQELTAAK	0.28	1.03412	1	0.911195	0.302835		0.255134
Q9H444	5	AALQALK	0.63	1	0.797512	1		0.502433
Q96GX9	5	HGVYVWGETWEK	0.76	1	1	0.949619	0.892595	1	0.72171
Q96GX9	5	ITHQEMIK	0.71	1	0.603265	1.05637		0.428318
Q96GX9	5	GAGAVIHTHSK	0.74	0.896623	1.10066	1	0.663501	1	0.825319
O75150	11	KEELVPSEEDFQGITPGAQGPSSR	0.37	1.01752	0.92536	0.911523	0.40076	0.351287	0.337264
O75150	11	EGPSLGPPPVASALSR	0.7	1	0.789983	1.00425		0.552988
O75150	11	GLLLATK	0.07	1	1	0.967451	0.0689977	0.073232	0.0677215
O14828	7	KLSPTEPK	0.14	1	1	0.966481		0.146993	0.135307
O14828	7	AQQEFAAGVFSNPAVR	0.55	1	0.985457	0.941693	0.584054		0.517931
O14828	7	ELQHAALGGTATR	0.67	0.939666	0.990261	1	0.629576		0.713019
O14828	7	TAAANAAAGAAENAFR	0.08	1.01852	0.978613	0.989054	0.0823836	0.0791555	0.0791244
P07992	5	SNSIIVSPR	0.09	1.01032	1.003	0.99602	0.169523	0.0854629	0.0892864
P61026	8	NIDEHANEDVER	0.74	0.949573	1	1.00408	0.702684	0.767575	0.770708
P61026	8	EPNSENVDISSGGGVTGWK	0.23	0.991535	0.821977	1		0.189055
P61026	8	AFLTLAEDILR	0.3	1.01138	0.981774	1	0.310108	0.294532
Q9UMY1	6	LLPDTILEK	0.48	1.04817	0.977795	1		0.461517	0.485689
Q9UMY1	6	FLSLANK	0.35	1	0.765395	1		0.267888
Q9UMY1	6	LTTASQTNIK	0.66	0.945305	1	1	0.595229		0.692755
Q9UMY1	6	LTTASQTNIKK	0.99	0.97339	1.01695	1	0.963656	1.00678	1
Q13084	6	EFYSEILDKK	0.53	1.00454	1	0.918625	0.502773	0.576949	0.486871
Q13084	6	IYVAELIQQLQQQALSEPAVVQK	0.08	1	0.878422	1	0.0790047	0.0702738	0.0966852
Q13243	5	LNEGVVEFASYGDLK	0.7	1.01688	1	1		0.738409	0.733246
Q13243	5	VSWQDLK	0.38	1	1	0.954659		0.419889	0.36277
Q13243	5	VTIEHAR	0.2	0.883558	1	1.11309	0.176712
P42226	7	GLLPEHFLFLAQK	0.15	1.00648	0.900567	0.990094	0.166651	0.135085
P42226	7	LYVDFPQHLR	0.95	1	0.974789	1	0.952744	0.92605	0.962276
P42226	7	VPFVVAER	0.94	1	1.0036	0.956274	0.973244	1.00201	0.845923
P49770	7	MTAAQPSETTVGNMVR	0.02	1	1	1.00754	0.0218337		0.0201507
Q07065	17	DLSDGIHVVK	0.55	1	0.99547	0.653822			0.359602
Q07065	17	LEGLGSSEADQDGLASTVR	0.57	0.97118	1	0.937009	0.571694	0.579351	0.534095
Q07065	17	VQEQVHTLLSQDQAQAAR	0.86	0.694306	0.99547	1.01767	0.597103
Q8TF74	5	TGPSGQSLAPPPPPYR	0.55	1.24157	0.558593	1		0.307226
Q8TF74	5	GLAPPPPTSASPSLLSNRPPPPAR	0.97	1	1.11317	0.941479	1	1.07978	0.913234
Q8TF74	5	YSFHPVEDFPAPEEYK	0.04	0.787856	1	1	0.0315143		0.0539265
Q8WWH5	5	GPTSAELLNR	0.78	0.975119	0.980943	1.00648	0.735607		0.849173
Q8WWH5	5	PARPVTVYSISLQK	0	1	1.03118	1	0	0
Q96A26	7	FKKEDEIPETVSLEMLDAAK	0.52	0.972557	1.00911	1	0.50573		0.535547
Q96A26	7	ILIWSGR	0.96	1	1	1	0.993502		0.961568
Q96HY6	8	VSIAELAQASNSLIAWGR	0.28	0.921944	1.02973	1	0.258144	0.315385
Q96HY6	8	FIYITPEELAAVANFIR	0.94	1.01921	0.987589	0.939448	1	0.987589	0.883081
Q96HY6	8	AASAGQEPLHNEELAGAGR	0.11	1	0.987589	0.987613	0.111832	0.109997	0.108637
Q9Y276	6	RPLNSVVLQQGLADR	0.86	1	0.968696	1.03321	0.887792	0.833078	0.96669
Q9Y276	6	LTFSGLLNALDGVASTEAR	0.09	1.01069	1	0.948881	0.0911494	0.0930996	0.0853993
P42858	9	TPPPELLQTLTAVGGIGQLTAAK	0.2	0.910864	0.912165	1.01945	0.195763	0.182433	0.244701
P42858	9	SDSALLEGAELVNR	0.99	0.910864	1	0.662424	0.910864	1	0.6558
P42858	9	AVTHAIPALQPIVHDLFVLR	0.32	1.0052	0.980212	0.441191			0.141181
P61313	15	FFEVILIDPFHK	0.85	0.997783	0.988987	0.988614	0.855418	0.846117	0.840322
P61313	15	GATYGKPVHHGVNQLK	0.16	0.997783	0.990475	0.973979	0.163439		0.155837
P61313	15	NPDTQWITKPVHK	0.49	0.992092	0.976049	1	0.486125	0.480009	0.494231
P09661	15	KLDGFPLLR	0.31	1	0.966151	1	0.311156	0.299507
P09661	15	TFNPGAGLPTDKK	0.81	1	0.964106	0.940669	0.814746	0.780926
P00374	6	YKFEVYEK	0.38	0.796026	1	1	0.30249
P00374	6	LLPEYPGVLSDVQEEK	0.95	0.781103	0.922842	1	0.742047	0.8767	1
P00374	6	MTTTSSVEGK	0.56	1.08034	0.870351	0.995918	0.720967	0.489394	0.557714
Q6P3W7	5	LGSSSLTNIPEEVR	0.93	0.926791	1.00061	0.938953	0.861915	1	0.938953
Q6P3W7	5	LILPELGPVFK	0.83	0.948223	1	1.07834	0.787025		1
Q6P3W7	5	ASLTLEEK	0.71	1.00396	1	0.920517	0.727085	0.723779	0.653567
Q9UQR1	5	FLQQALDR	0.04	1	1	1	1	0.0708727	0.0390763
Q8NEF9	5	EATVISEQK	0.09	0.9906	1.03097	0.711921			0.0640729
Q8NEF9	5	KLESVFFHSLSGSK	0.12	0.887857	1	1	0.106543	0.13427	0.133887
Q8NEF9	5	AVTIANSPSKPSEK	0.15	1	0.466097	1		0.0699145
Q8NEF9	5	SALGDDINFEK	0.25	1.02581	0.916981	1	0.313167	0.229245	0.271854
P29992	6	MVDVGGQR	0.7	1	1	1.03422	0.798433	0.672252	0.793392
P29992	6	LLLLGTGESGK	0.33	0.876717	1	1	0.289317	0.361483
P29992	6	IATLGYLPTQQDVLR	0.55	1.00124	0.924056	0.913604	0.679737	0.508231	0.543779
Q96IZ0	5	LMQDKEEMIGK	0.7	1	0.927345	1.12159	0.754137	0.649142
Q96IZ0	5	LKEEIDLLNR	0.63	1	0.992386	1	0.63424	0.614897
Q96IZ0	5	DANVSGTLVSSSTLEK	0.81	1	1.01676	0.739154	0.940448		0.598715
Q9UN37	6	WNDVAGLEGAK	0.41	0.965691	1.06491	0.979516	0.395933	0.457753	0.384142
Q9UN37	6	SLATTRPTVNADDLLK	0.72	1	1	1	0.74558	0.72896	0.66507
Q6YHK3	14	IPVQLVFK	0.88	0.890835	1	0.993268	0.783934		0.923031
Q6YHK3	14	VGSPFELVVSGNK	0.09	1.00549	0.982509	0.9855	0.0979082	0.0884258
Q6YHK3	14	YQPNIDVQESIHFLESEFSR	0.14	0.940729	0.969521	0.997316	0.12884	0.135733	0.144014
Q9Y2Q9	7	RPEVDGEK	0.23	0.984489	0.95721	1.05768		0.220158	0.259434
Q9Y2Q9	7	HSELLQK	0.24	1.03157	0.898609	1	0.279852	0.215666
Q9Y2Q9	7	AGGFASALER	0.99	0.984489	1.01645	0.980382	0.984489	1.00629	0.970578
Q5T5X7	6	LFPELFDHR	0.62	0.980823	1	0.785631		0.809773	0.487091
Q5T5X7	6	HYVEAVYPVEK	0.82	1.12203	0.974563	0.944696	0.992967	0.845925	0.774651
Q5T5X7	6	VWTLEFVGK	0.77	0.733307	1.04231	1	0.564646	1
Q9BRX5	7	SAGAETDNAVPQGSK	0.67	1.01294	1	0.93116			0.623877
Q9BRX5	7	ILSVELPK	0.52	0.98531	0.999168	1.0235	0.506239	0.519568	0.535593
Q9BRX5	7	LELPLWLAK	0.64	0.98531	0.974877	1	0.638588	0.623921	0.660104
Q99986	13	TVLQLSLR	0.36	0.967605	1	1	0.348338	0.360726	0.341467
Q99986	13	LLDYTEKPLYENLR	0.17	0.876719	1.00488	1	0.149042	0.189843
Q99584	6	DVGSLDEK	0.36	1	0.963836	1	0.383528	0.346981	0.375525
Q99584	6	KDSLSVNEFK	0.84	1	0.98357	1.02131	0.876943	0.826199	0.895631
Q99584	6	SLDVNQDSELK	0.06	0.953708	1.02981	0.99055	0.0572225	0.0658697	0.0610175
P62899	9	NLQTVNVDEN	0.18	1	0.977258	1.02417		0.175906	0.189427
P62899	9	EMGTPDVR	0.96	1	0.952049	0.978596	1	0.913967	0.971789
P62899	9	EYTINIHKR	0.44	0.938096	0.994294	1	0.412762
Q9H6F5	11	KAEVVQVIR	0.22	0.970264	0.987225	1	0.213458	0.219705	0.222442
Q9BRG1	6	KLPVESIQIVLEELR	0.92	1	1.00434	0.944198	0.923706	0.980058	0.868662
Q9BRG1	6	AEIITVSDGR	0.04	1	0.946595	1	0.0400076	0.0378638	0.042372
Q9BRG1	6	LIYQWVSR	0.73	1	1	0.947959	0.730033	0.77122	0.69201
Q7Z3C6	7	AHSTMTGSGVDAR	0.29	1.05423	0.9848	0.465758			0.13507
Q7Z3C6	7	LPLGGWAEDGQSASR	0.19	1	0.880054	0.858906	0.235281	0.16721
Q7Z3C6	7	SPWHHIENLDLFFSR	0.69	0.421521	0.9848	1	0.29085
P53367-2	5	TIEDTLMTVK	0.69	1	1	1	0.726964	0.742569
P53367-2	5	LAQTLSTQLFQMVHTQR	0.6	1	0.929207	1.02935		0.557524
P78316	14	HDVGLPGVSR	0.06	1	0.9605	0.903074	0.05977	0.0596835	0.0541844
P78316	14	APTSTEANHIR	0.38	1	0.657686	0.988023		0.249921
P11279	6	FFLQGIQLNTILPDAR	0.35	0.979033	1.00707	0.981075	0.342661	0.372067	0.352695
P11279	6	TVESITDIR	0.08	0.995532	0.973051	0.985416	0.0796426	0.0786314	0.0796306
P11279	6	AFSVNIFK	0.51	1	0.973051	1.00458	0.512289	0.499036	0.522832
P46934-4	9	EGFFELIPQDLIK	0.56	0.955571	1	0.994401	0.494935	0.579582	0.576337
P46934-4	9	LLFEVFDENR	0.45	1.08119	1	0.97891	0.49202	0.450059	0.44051
Q9UHA4	5	KLPSVEGLHAIVVSDR	0.54	1	0.840532	1.1838	0.644715	0.562662
Q96HW7	10	IASLLGLLSK	0.7	1.01135	0.89521	0.978534	0.747608	0.630686	0.684974
Q96HW7	10	YFIADLPHLQDSFVDK	0.14	0.863737	0.91226	1	0.120923		0.156672
Q9BWH6	8	GLLATSLLPR	0.16	0.952776	1.03292	1	0.152444	0.165979	0.126544
Q9BWH6	8	ASLLASQALHR	0.93	1.00144	0.987389	1	0.958492	0.889006	0.952154
Q9BWH6	8	DTSSVAVNLPVPSGVAFPAVFLR	0.31	0.984078	1	0.93188	0.327364	0.332661	0.288883
P68400	15	FVHSENQHLVSPEALDFLDK	0.36	0.9435	0.965416	0.982777	0.33966	0.363858	0.370401
P68400	15	DVKPHNVMIDHEHRK	0.73	1.02172	0.626696	0.915526		0.457488
P68400	15	YSEVFEAINITNNEK	0.83	0.998548	0.935582	0.915526	0.837047	0.776533	0.765425
Q9BYD3	7	TFNLIPAVGLNVHSMLK	0.82	1	1	0.983177	0.857544	0.835597	0.806205
Q9BYD3	7	KVELPVPTHR	0.08	0.98132	1.00709	1	0.079211	0.0812915	0.0813689
Q92665	8	LNIFDMMAVTK	0.35	0.978237	1.01367	0.982199	0.342383	0.362393	0.345319
Q92665	8	IEPLSPELVAAASAVADSLPFDK	0.62	0.982647	1	0.93938	0.637012	0.659193	0.582416
Q92665	8	ISFSNIISDMK	0.04	0.940677	0.983416	1.01723	0.0376271		0.0432751
Q9BUL8	6	AINVFVSANR	0.83	0.868209	1	1	0.720614
Q9BUL8	6	SVEVNFTESLLR	0.8	0.937669	0.980212	1	0.750135	0.827039	0.843735
Q9BUL8	6	ENPGLTQDIIMK	0.71	1.08227	0.87341	1		0.620121
Q9BUL8	6	IPDEINDR	0.85	1	0.958787	1	0.874357	0.814969	0.864677
Q8WW59	7	SWVFTYAQR	0.39	1.02836	1	0.650233			0.253591
Q8WW59	7	YGLVGLEPTK	0.43	1	0.948996	0.962903	0.45311	0.408068	0.436301
P62820	8	TIELDGK	0.98	1	0.964378	1	1.01943	0.94509	1
P62820	8	VVDYTTAK	0.35	1.01594	0.985156	1	0.361073	0.344804
P62820	8	MGPGATAGGAEK	0.77	0.99962	1	0.932333	0.825572		0.717896
Q96DV4	9	LAFLLFK	0.41	1	1	1.00733	0.394968	0.406283	0.418882
Q8IVM0	5	DQEWYDAEIAR	0.21	1	1	1	0.215116	0.343002	0.325402
Q8WU90	12	HFLEAIENNK	0.34	0.999504	0.952568	1.00438	0.335795	0.305753	0.385024
Q8WU90	12	HALPPGFVLK	0.66	1	0.839501	0.887365	0.739996	0.554071
Q8WU90	12	FGQQNPR	0.96	1.01202	0.952568	0.64568	1	0.952568	0.619852
Q8WU90	12	FSTYTSDKDENK	0.47	0.836272	1.05979	0.836595	0.393048	0.625279
O43633	5	SNNSMAQAMK	0.73	1	0.701749	0.939972	1	0.512277	0.933621
O43633	5	TPEELLR	0.48	1	1	1	0.564334	0.684005	0.484218
P14635	9	VSEQLQAK	0.24	1	0.999343	0.963344	0.262198	0.248969	0.231202
P14635	9	ALNFGLGRPLPLHFLR	0.54	0.997815	0.821965	1.02963		0.443861
P14635	9	ILDNGEWTPTLQHYLSYTEESLLPVMQHLAK	0.85	0.950167	1.0471	1	0.807642	0.935282
Q9UNN5	11	LSLEADR	0.79	1	0.982233	0.925659	0.849015		0.73127
Q9UNN5	11	EENAEPVSK	0.87	1.00522	0.982233	0.973256	0.910776	0.878024	0.846733
Q9UNN5	11	TDQFPLFLIIMGK	0.72	0.937954	0.986309	1	0.675327	0.737231	0.747464
Q99570	7	LAYAENIALLAETALR	0.11	0.381973	1	1.03302	0.042017
Q99570	7	GVIDLAALGITGR	0.89	0.945752	0.910316	1	0.924645	0.810181	0.959833
Q9NUQ7	5	GTSIVVPEPLHFLLPGK	0.89	1	1	1.06479	0.952209	0.910522	0.978095
Q9NUQ7	5	ELHDLFNLPHDRPYFK	0.75	0.787368	1.0699	0.98072	0.590526	1.01912
Q9NUQ7	5	GTSIVVPEPLHFLLPGKK	0.8	1	0.977462	1	0.875654	0.781969	0.82237
Q68CQ4	14	AIQAVATNPK	0.13	0.994178	0.94093	1	0.124672	0.123037	0.130761
Q68CQ4	14	FNFFVNK	0.6	1	0.947422	0.963868	0.600476	0.589762	0.578321
P07951-2	9	MELQEMQLK	0.94	1	0.975753	1	0.963359	0.917208	0.979632
P07951-2	9	SLMASEEEYSTK	0.29	0.991406	1.06735	0.974517	0.246968	0.319972	0.28506
Q9H8H0	8	IWNNEDVNLDK	0.81	0.749495	1.07688	1	0.607091
Q9H8H0	8	TDQFLVTDSGR	0.15	1.00325	0.89808	1		0.134712	0.171121
Q99848	17	GLLKPGLNVVLEGPK	0.82	0.98594	0.944006	1	0.829447	0.774085	0.841352
Q99848	17	SDLQMQK	0.39	0.995687	0.922887	0.945929	0.407509	0.359926
Q99848	17	VQTEVLQK	0.83	1.00881	0.968499	0.920863	0.863826		0.764316
Q99848	17	LDVTLGPVPEIGGSEAPAPQNK	0.6	0.926922	0.968499	1.03808	0.556153		0.662568
Q14011	5	GFGFVTFENIDDAK	0.54	1.02861	0.989539	0.983037	0.61523	0.543571	0.53084
Q14011	5	SQSGGYSDR	0.82	0.918415	1	1	0.7531
Q14011	5	YGQISEVVVVK	0.58	1	0.952492	1	0.631523	0.568253	0.596596
Q14011	5	LFVGGLSFDTNEQSLEQVFSK	0.73	0.48153	1.01936	1	0.351517
Q9BV40	5	NLQSEVEGVK	0.65	1	0.978778	1	0.688376	0.636206
Q9BV40	5	NKTEDLEATSEHFK	0.53	1.0001	1	0.941325	0.549494	0.541492
Q9BV40	5	GENLEHLR	0.39	1	1.03053	1.01287	0.392286	0.410619
Q86W50	7	LPGVAGQYLFK	0.79	1.21025	1	0.812815	1		0.642124
Q86W50	7	LIPTVPLR	0.85	1	1.03242	0.994602	0.702336	0.806092	0.869009
P14927	7	DDTIYEDEDVKEAIR	0.68	1	1	0.856421	0.785458	0.821585	0.582366
O60934	6	SGDGITFGVFGSK	0.07	1	1	0.984879	0.0758741	0.0710747	0.0689415
O60934	6	EESLADDLFR	0.51	1.0732	1	0.935184	0.598578		0.476944
O60934	6	LLPAAGPAGGEPYR	0.43	0.936746	1	0.910836	0.442232	0.472094	0.391659
O60934	6	LLTGVEYVVGR	0.6	0.90881	1.04636	0.957745		0.655518	0.574647
A4D1E9	6	DFLHLFEK	0.05	0.913031	0.930816	1.06234	0.0490447	0.0465408	0.0583078
A4D1E9	6	TVEFQHIIPISAVTGEGIEELK	0.91	1	0.969272	1	0.923965	0.882037	0.959293
A4D1E9	6	ILVAQGGLGGK	0.77	0.943725	1	0.978689	0.742492	0.786767	0.75359
Q9UKZ1	5	LPDLVENNPLVAIEMLLK	0.97	0.967991	1.0223	1.01257	0.938951		0.987556
Q9UKZ1	5	TLDTGETPSETK	0.12	1	1	1	0.122676	0.124681	0.123003
Q9UKZ1	5	LVYHIGLTPAK	0.2	1	0.962453	0.997336		0.192491	0.211869
P05387	10	ILDSVGIEADDDRLNK	0.57	0.990529	1	0.940421	0.563262	0.585717
O15061	9	YSWQDEIVQGTR	0.73	0.918465	0.974933	0.905287	0.67048	0.774881	0.719526
O15061	9	TFVLAGSADSPELGK	0.02	1	1.05103	0.665114	0.0242193		0.0133023
O15061	9	EVPVYIGEDSTIAR	0.12	0.894855	1	0.861792	0.107383	0.137548	0.115566
O15061	9	ENLLLEEELR	0.26	1	0.627874	1.06088		0.163247
Q9GZU8	5	LTVKPIETK	0.74	1.00866	0.913744	1		0.676171	0.91621
Q9GZU8	5	FVSEAELDER	0.23	1	1	0.957981	0.253165	0.226359	0.220336
Q16204	7	SGGIVISPFR	0.53	0.964471	1	0.948575	0.538882	0.558733	0.502745
Q16204	7	MAQYLEEER	0.09	0.986524	0.869147	1		0.0782232	0.10355
Q16204	7	IELETYK	0.76	1	1	0.992288	0.776369	0.765906	0.754139
Q8NEB9	5	GIIPETATLFK	0.56	0.831155	1	1.00925	0.465447		0.964241
Q8NEB9	5	LQALLGDNEK	0.03	1.30402	1	0.809627	0.0391548		0.0242888
Q9H223	10	SISVIDSPGILSGEK	0.19	1	0.892575	1		0.169589	0.204236
Q9H223	10	LFEAEAQDLFR	0.46	1.01407	0.969831	0.984213	0.479523	0.453278	0.452738
Q9H223	10	FGNAFLNR	0.3	0.988302	0.987112	0.999455	0.296652	0.296295	0.296628
Q9H223	10	LIEAVDNMLSNK	0.99	0.988387	0.969831	0.889957	0.988302	0.969831	0.881057
Q9Y5S9	6	NIHLNLDRR	0.52	1	1	0.998951	0.527939	0.554072
Q9Y5S9	6	SVEGWILFVTGVHEEATEEDIHDK	0.02	0.819596	1	1.00724	0.0163919
P40222	11	YAELLEEHR	0.88	0.780055	0.983007	0.988979	0.698315	0.865046	0.885347
P40222	11	SSEVFTTFK	0.54	0.806475	1	0.911515		0.584851	0.492218
P40222	11	DKELEGLQVK	0.3	0.508853	1	1	0.152656
P40222	11	ALLEMAEEK	0.67	1	1	0.963321		0.686625	0.621887
Q8NCN5	5	YTALNLIGPR	0.49	1	1	1	1	0.507312	0.481896
Q8WVY7	6	GLIDVKPLGVIWGK	0.54	0.974975	1	1	0.526486	0.552705	0.553852
Q8WVY7	6	LDDFLDLNHK	0.89	1.01496	0.927497	0.997931	0.998921	0.825473
Q8WVY7	6	LLVLDVDYTLFDHR	0.33	1	1	0.912726	0.370067		0.3012
Q8TCD5	6	LLSWSDNWR	0.7	1	0.930388	1	0.890841	0.651272	0.705188
Q8TCD5	6	DKTVVLGDLLIDDKDTVR	0.61	0.844566	1	1.06691	0.515185	0.605917	0.759798
Q9UHD9	6	SQTDQLVLIFAGK	0.83	1.02368	0.954205	1	0.931603	0.79199	0.868171
O95817	10	EGHPVYPQLRPGYIPIPVLHEGAENR	0.93	1.07023	1	0.88014	1	0.953318	0.81853
O95817	10	THYPAQQGEYQTHQPVYHK	0.5	0.956886	0.958409	0.902208	0.499205	0.479205	0.47068
O95817	10	TEAAAAAPQR	0.09	0.982479	1	0.894855		0.0907395	0.0805369
O95817	10	ELLALDSVDPEGR	0.49	0.919181	1	0.818554		0.540077	0.401091
Q9Y371	5	LAADAGTFLSR	0.64	0.98305	1.059	1	0.612156	0.688054
Q9Y371	5	GKVPITYLELLN	0.75	1	1	0.695284			0.521463
Q9Y371	5	ELIQTSALNFLTPLR	0.91	1.02776	0.805154	1		0.73269
Q99707	15	IPLLIGGATTSK	0.01	0.73206	0.871961	0.986103	0.0073206
Q99707	15	VPPATAFEGHMLLSGLEPFR	0.21	1	0.699004	0.924527	0.25685	0.146791
Q99707	15	AALFALQNLFEEK	0.17	1	0.942122	0.819013	0.184386		0.139232
Q9HA77	10	AWLQPTGR	0.28	1	1	0.992046	0.282274		0.277745
Q9UNQ2	6	LQVLVGDVLK	0.7	0.936682	1	1.01517	0.655678		0.783454
Q9UNQ2	6	VQGTPVASK	0.03	1.04402	1	0.963293	0.0325731	0.0308887	0.0288988
Q9Y376	12	LLHSENYVTK	0.19	0.961067	1	0.943292	0.182603	0.197697	0.186486
O00418	10	AFDSGQNLSPDR	0.37	1	0.954855	0.816054	0.441268		0.30194
O00418	10	DRPGKPLFHLEHYIEGK	0.71	0.899137	0.954855	1.01	0.638387	0.671422	0.819471
Q08170	7	GESENAGTNQETR	0.09	1	1	0.732359	0.11873		0.0659123
Q08170	7	KNEGVIEFVSYSDMK	0.45	0.909344	0.866457	1	0.472274	0.389906	0.529255
Q08170	7	NGYGFVEFDDLR	0.85	0.846859	1.06868	0.878557	0.71983	1
Q08170	7	NEGVIEFVSYSDMK	0.04	0.815491	1	0.926978	0.0326197	0.0462899	0.0413464
O75312	6	AISGLEQDQPAR	0.08	0.961291	0.9929	1	0.0774533	0.0778554	0.0805721
O75312	6	GALTTVEGLITR	0.86	1.01865	0.940307	1	1	0.808664
O00534	7	FVLPAVLNPR	0.82	1.03743	1	1	0.861812	0.793722	0.839753
O00534	7	DVPRPILLGASAPLK	0.92	1	1	0.976478	0.954477	0.911969	0.89836
O00534	7	ALHSDRPPSASQPR	0.38	0.997216	0.932306	1.01025		0.354276	0.416572
Q9H299	5	VYSTSVTGSR	0.41	1	1	0.90622		0.438588	0.37155
Q9H299	5	IQYQLVDISQDNALRDEMR	0.5	0.804857	1	1.003	0.402428
Q9H299	5	IQYQLVDISQDNALR	0.71	1.07222	1	0.846504			0.601018
Q9H299	5	SQQSEVTR	0.48	0.83224	1	1	0.399475	0.526317
Q9NQT8	7	ILWGNNHFFR	0.68	1	1	0.879603		0.736006	0.59813
Q9NQT8	7	VILNPVNTNLSK	0.6	1.00279	1	0.734589			0.440754
Q9NQT8	7	DLYQEWK	0.05	0.956497	1	0.736232			0.0368116
Q13740-2	8	VLHPLEGAVVIIFK	0.52	0.984227	0.696507	1		0.362183
Q13740-2	8	ALFLETEQLK	0.81	0.947306	0.965155	1.00347	0.767318	0.812246	0.844493
Q13740-2	8	WKYEKPDGSPVFIAFR	0.52	1	0.731298	0.991904		0.380275
P61011	14	VDVASVIVTK	0.05	0.960481	0.904736	1		0.0452368	0.0553674
P61011	14	AGAFDQLK	0.16	0.957231	1.01097	0.998146	0.152476	0.155133	0.160246
Q9NPJ6	6	EAEQILATAVYQAK	0.73	1	1.09108	0.989481	0.773042	0.855835	0.702258
Q9NPJ6	6	ELIEMLAISR	0.67	1.04805	1	1	0.80279	0.712348	0.71072
Q99816	7	KKDEELSSALEK	0.2	1.06383	1	0.712397			0.142479
Q99816	7	ASLISAVSDK	0.36	0.867278	1	1.02791	0.31222	0.396415
Q99816	7	GVIDLDVFLK	0.51	0.988309	1	0.943294		0.540658	0.48108
O14777	7	LKDLFNVDAFK	0.03	0.904844	1	1	0.0271453	0.0317822	0.0287203
O14777	7	YSVADIER	0.95	0.75172	0.988428	1.00696	0.714134	0.988428	1
O14777	7	LFLDYTIK	0.58	1	0.625125	1		0.362573
Q99417	6	VLVALYEEPEKPNSALDFLK	0.44	1.03992	1	0.880113		0.476981	0.38725
Q99417	6	HHLGAATPENPEIELLR	0.06	0.938244	1	1	0.0562946	0.0640845
Q99417	6	SGVLDTLTK	0.84	1	0.983693	1.1007	0.853925	0.826302	0.944837
